# Supplementary material for: Ketogenic Effects of Multiple Doses of a Medium Chain Triglycerides Enriched Ketogenic Formula in Healthy Men under the Ketogenic Diet: A Randomized, Double-Blinded, Placebo-Controlled Study
Source: MDPI journal article supplement (doi:10.3390/nu14061199), 2022-03-12

# Supplemental Figure 1. Changes in the secondary endpoints

Values are presented as least square mean  $\pm$  standard error. BB: before breakfast, AB: after breakfast, BL: before lunch, AL: after lunch, BD: before dinner, AD: after dinner, BS: before sleep.

■: KD + placebo, ●: KD + KF group. \*:  $p < 0.05$ , \*\*:  $p < 0.01$ , vs. KD + placebo group.

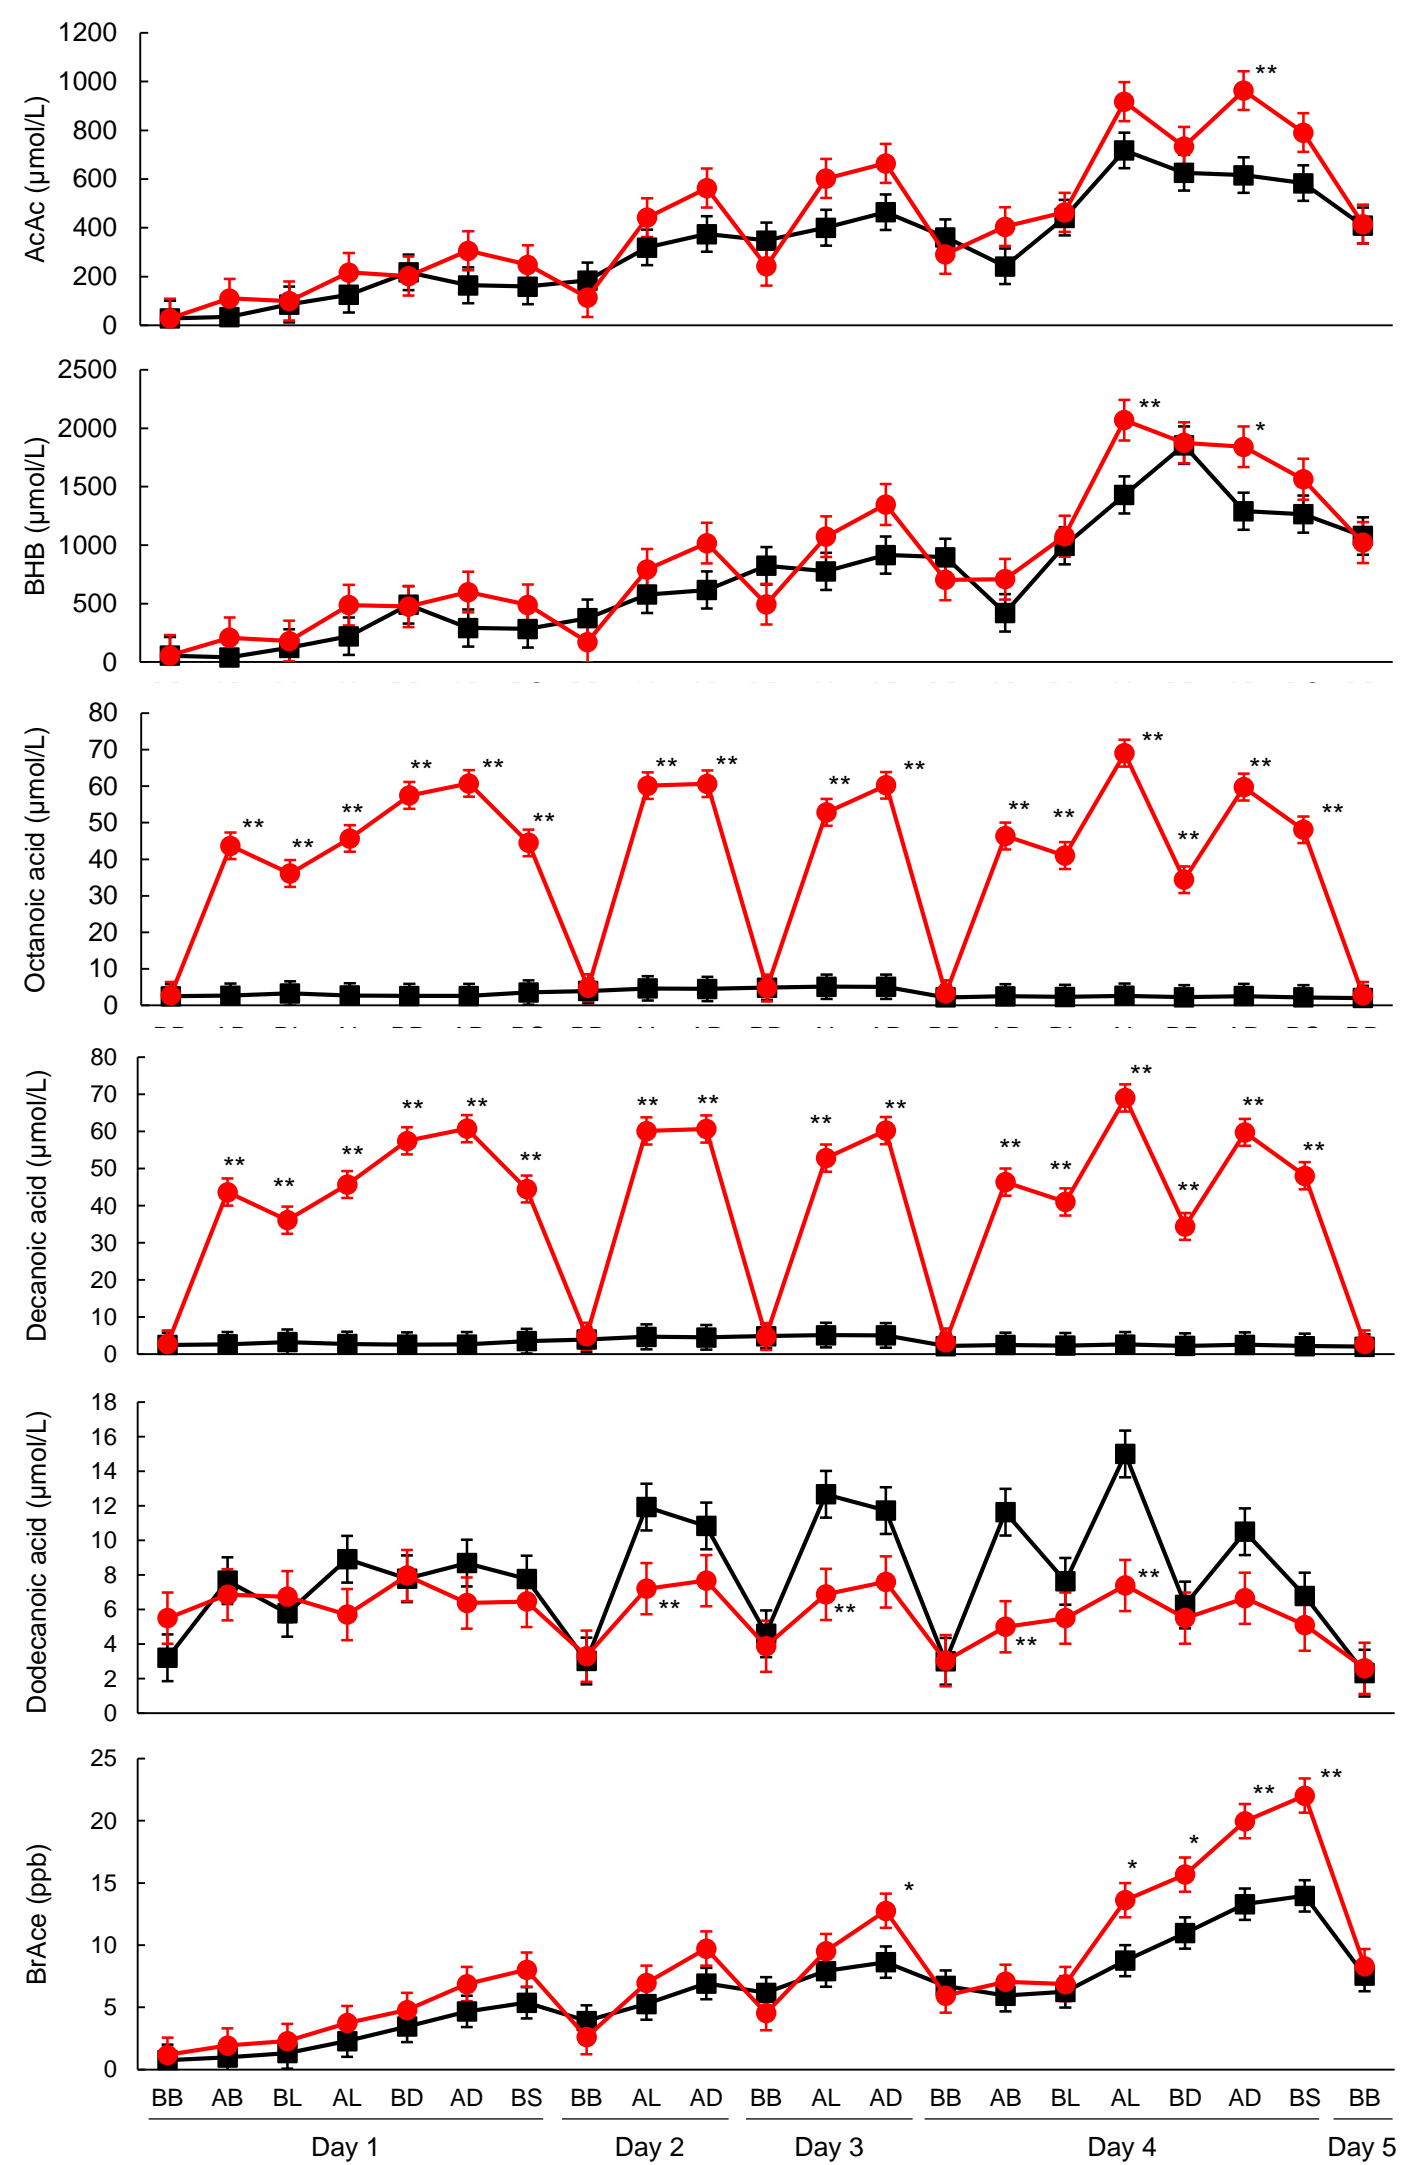

Supplement: s1 [file s1]
