# Supplementary material for: Ketogenic Effects of Multiple Doses of a Medium Chain Triglycerides Enriched Ketogenic Formula in Healthy Men under the Ketogenic Diet: A Randomized, Double-Blinded, Placebo-Controlled Study
Source: MDPI journal article supplement (doi:10.3390/nu14061199), 2022-03-12

**Supplemental Figure 3.** Alteration of the Shannon index of gut microbiota

Microbiota diversity was assessed by the Shannon index based on 97% nucleotide sequence identity. microbiota diversity indices (Shannon index) tended to increase in the KD + placebo and the KD + KF group. no interaction was detected between the group and the test day ( $p = 0.293$ ).

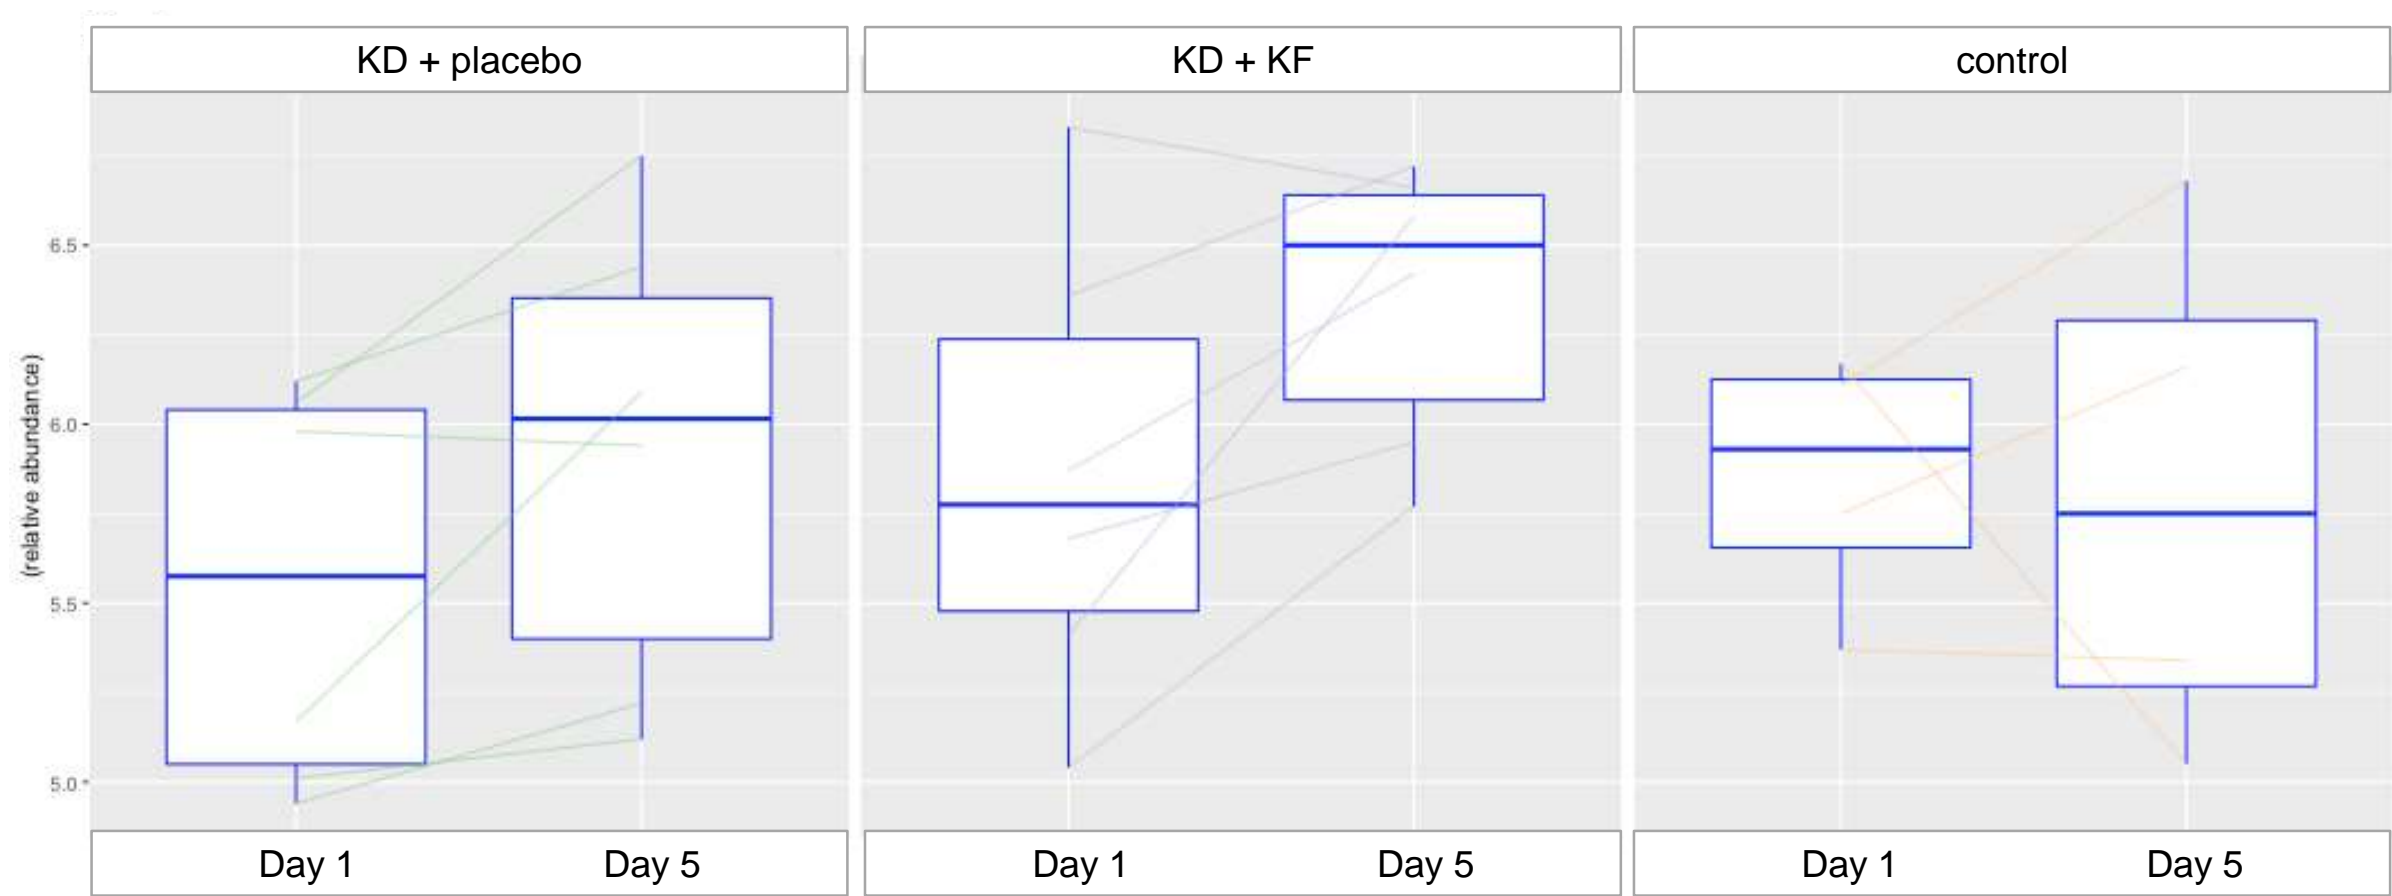

Supplement: s1 [file s1]
