# Supplementary material for: Ketogenic Effects of Multiple Doses of a Medium Chain Triglycerides Enriched Ketogenic Formula in Healthy Men under the Ketogenic Diet: A Randomized, Double-Blinded, Placebo-Controlled Study
Source: MDPI journal article supplement (doi:10.3390/nu14061199), 2022-03-12

**Supplemental Figure 4. FB ratio**

The FB ratio is the ratio of the phylum *Firmicutes* to the phylum *Bacteroidetes*.  
The phylums *Firmicutes* tend to decrease only in the KD +KF group.  
the result showed a significant difference in interaction effects between the group and the test day ( $p = 0.017$ )

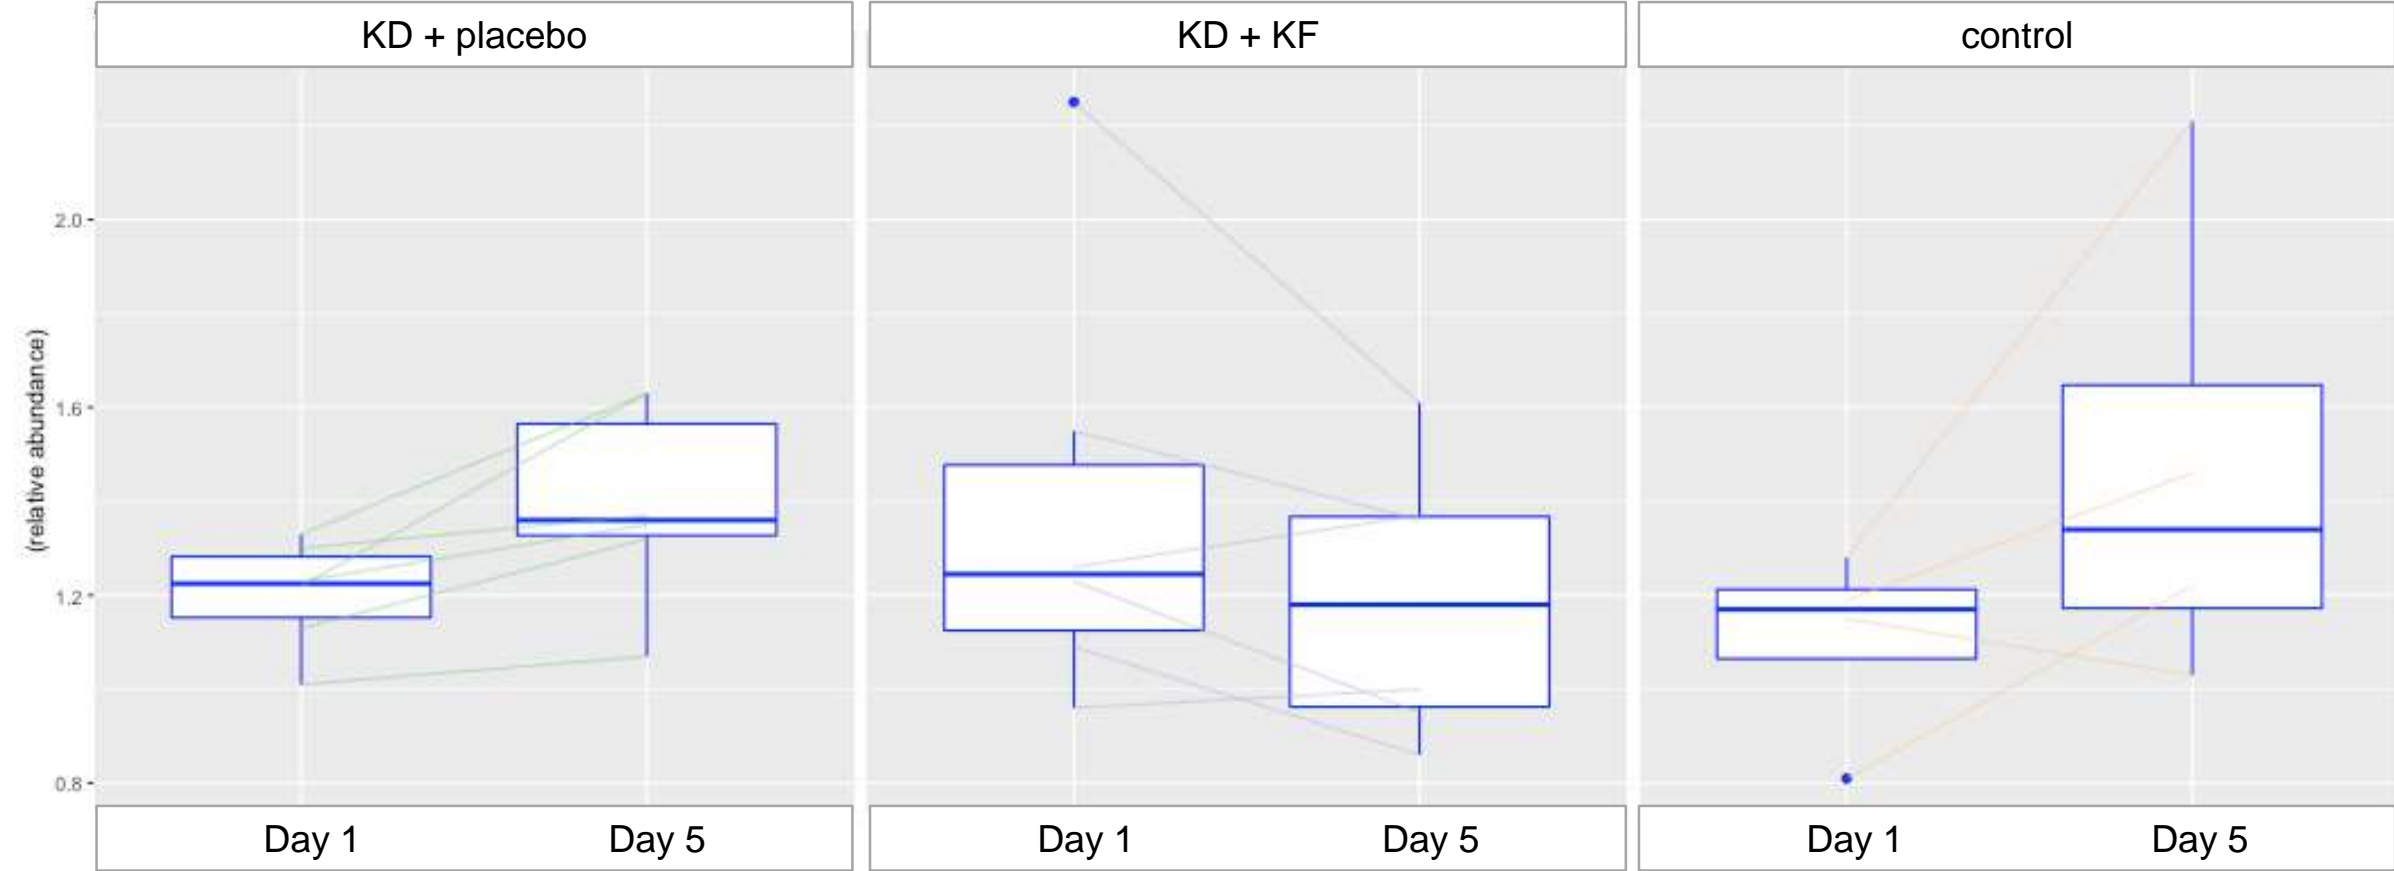

Supplement: s1 [file s1]
