# Supplementary material for: Ketogenic Effects of Multiple Doses of a Medium Chain Triglycerides Enriched Ketogenic Formula in Healthy Men under the Ketogenic Diet: A Randomized, Double-Blinded, Placebo-Controlled Study
Source: Nutrients. 2022 Mar 12;14(6):1199. doi: 10.3390/nu14061199 (PMC8955388; doi:10.3390/nu14061199)
Supplement: Supplementary file 1 [file nutrients-14-01199-s001.zip]

Archive with 10 entries (10 files):
- Supplemental_Figure_1.pdf
- Supplemental_Figure_2.pdf
- Supplemental_Figure_3.pdf
- Supplemental_Figure_4.pdf
- Supplemental_Table_1.xlsx
- Supplemental_Table_2.xlsx
- Supplemental_Table_3.xlsx
- Supplemental_Table_4.xlsx
- Supplemental_Table_5.xlsx
- Supplemental_Table_6.xlsx
