# Supplementary material for: Ketogenic Effects of Multiple Doses of a Medium Chain Triglycerides Enriched Ketogenic Formula in Healthy Men under the Ketogenic Diet: A Randomized, Double-Blinded, Placebo-Controlled Study
Source: Nutrients. 2022 Mar 12;14(6):1199. doi: 10.3390/nu14061199 (PMC8955388; doi:10.3390/nu14061199)
Supplement: Supplementary file 1 [file nutrients-14-01199-s001.zip › Supplemental_Table_1.xlsx]

## Sheet: Sheet1
Supplemental Table 1. Subjects' characteristics of anthropometric measurements at screening
	KD + placebo (N = 6)	KD + KF (N = 6)	Control (N = 4)	Comparison between groups (p value)
Age, years	24.2 ± 4.9	23.8 ± 3.7	26.3 ± 4.6	0.678
Height, cm	171.20 ± 3.35	170.70 ± 2.97	169.65 ± 3.08	0.75
Body weight, kg	61.97 ± 6.53	62.28 ± 6.03	59.95 ± 5.52	0.826
BMI, kg/m2	21.08 ± 1.54	21.35 ± 1.87	20.80 ± 1.30	0.872
Body fat mass, kg	10.72 ± 3.00	10.15 ± 2.60	10.05 ± 3.82	0.929
Muscle mass, kg	48.40 ± 4.68	49.13 ± 4.13	47.10 ± 2.26	0.74
Skeletal muscle mass, kg	28.62 ± 2.90	29.17 ± 2.77	27.93 ± 1.35	0.759
Right arm muscle mass, kg	2.667 ± 0.343	2.703 ± 0.313	2.630 ± 0.192	0.931
Left arm muscle mass, kg	2.618 ± 0.387	2.722 ± 0.340	2.578 ± 0.143	0.768
Trunk muscle mass, kg	22.367 ± 2.078	22.717 ± 1.884	22.100 ± 1.023	0.866
Right leg muscle mass, kg	8.362 ± 0.959	8.193 ± 0.608	7.973 ± 0.464	0.722
Left leg muscle mass, kg	8.418 ± 1.014	8.165 ± 0.587	7.968 ± 0.495	0.657
Values are presented as mean ± standard deviations.
