# Supplementary material for: Ketogenic Effects of Multiple Doses of a Medium Chain Triglycerides Enriched Ketogenic Formula in Healthy Men under the Ketogenic Diet: A Randomized, Double-Blinded, Placebo-Controlled Study
Source: Nutrients. 2022 Mar 12;14(6):1199. doi: 10.3390/nu14061199 (PMC8955388; doi:10.3390/nu14061199)
Supplement: Supplementary file 1 [file nutrients-14-01199-s001.zip › Supplemental_Table_2.xlsx]

## Sheet: Sheet1
Supplemental Table 2. Subjects' characteristics of safety measurements at screening
	KD + placebo (N = 6)	KD + KF (N = 6)	Control (N = 4)	Comparison between groups (p value)
Body temperature, °C	36.62 ± 0.29	36.63 ± 0.30	36.58 ± 0.24	0.95
Maximum blood pressure, mmHg	125.0 ± 6.1	122.7 ± 10.7	123.0 ± 3.5	0.861
Minimum blood pressure, mmHg	76.7 ± 12.8	75.5 ± 7.5	76.5 ± 6.6	0.976
Heart rate, times/minute	61.5 ± 13.8	65.0 ± 12.9	65.3 ± 6.0	0.848
Right grip strength, kgf	44.52 ± 3.07	39.68 ± 5.37	41.05 ± 5.84	0.235
Left grip strength, kgf	42.95 ± 6.92	41.27 ± 4.76	40.38 ± 5.07	0.772
Right toe strength, kgf	4.72 ± 1.85	4.55 ± 1.21	5.68 ± 1.21	0.491
Left toe strength, kgf	4.98 ± 1.91	4.13 ± 1.33	4.95 ± 1.38	0.606
Medial knee strength, kgf	26.50 ± 6.65	25.88 ± 4.70	29.28 ± 3.80	0.609
Lateral knee strength, kgf	17.98 ± 6.69	20.40 ± 6.76	21.08 ± 8.09	0.759
White blood cell count, ×103 / μL	6.380 ± 1.942	5.953 ± 1.174	4.855 ± 0.755	0.293
Red blood cell count, ×106 / μL	5.293 ± 0.291	5.177 ± 0.241	5.420 ± 0.415	0.489
Hemoglobin, g / dL	15.63 ± 0.96	15.43 ± 0.70	15.73 ± 0.75	0.844
Hematocrit, %	47.00 ± 1.87	46.58 ± 1.74	48.08 ± 2.28	0.498
Platelet count, ×103 / μL	278.7 ± 59.1	261.8 ± 34.4	252.8 ± 40.2	0.673
AST, U / L	17.7 ± 3.9	18.2 ± 1.6	20.3 ± 2.6	0.394
ALT, U / L	16.5 ± 6.1	22.3 ± 11.9	19.8 ± 8.1	0.556
γGTP, U / L	21.3 ± 6.3	26.7 ± 16.3	19.5 ± 7.2	0.582
ALP, U / L	209.8 ± 37.3	241.3 ± 57.0	254.0 ± 57.8	0.376
Urea nitrogen, mg / dL	12.0 ± 2.5	11.7 ± 2.1	12.3 ± 3.3	0.938
Creatinine, mg / dL	0.845 ± 0.099	0.770 ± 0.053	0.838 ± 0.048	0.2
Uric acid, mg / dL	5.57 ± 1.00	6.12 ± 0.93	5.70 ± 0.70	0.571
Total cholesterol, mg / dL	167.5 ± 23.1	177.0 ± 20.0	183.5 ± 24.0	0.533
Triglyceride, mg / dL	66.0 ± 16.9	99.3 ± 56.6	66.5 ± 15.7	0.265
HDL cholesterol, mg / dL	52.8 ± 8.2	52.8 ± 12.4	63.5 ± 11.4	0.264
LDL cholesterol, mg / dL	108.8 ± 25.4	109.2 ± 13.1	110.3 ± 20.5	0.994
Albumin, g / dL	4.75 ± 0.12	5.03 ± 0.18	4.80 ± 0.08	0.009
Transthyretin, mg / dL	31.40 ± 4.26	34.77 ± 4.65	35.03 ± 3.99	0.334
Blood glucose, mg / dL	84.7 ± 3.5	88.0 ± 4.9	87.8 ± 1.3	0.287
Glucagon, pg / mL	128.5 ± 16.5	129.3 ± 24.5	142.8 ± 6.1	0.454
Insulin, μIU / mL	4.95 ± 1.63	5.07 ± 2.34	4.50 ± 1.05	0.887
CRP, mg / dL	0.030 ± 0.017	0.023 ± 0.008	0.020 ± 0.000	0.394
Na, mEq / L	139.3 ± 1.2	139.5 ± 0.8	139.5 ± 1.7	0.967
K, mEq / L	4.27 ± 0.22	4.10 ± 0.14	4.25 ± 0.26	0.345
Cl, mEq / L	102.0 ± 1.4	102.0 ± 1.7	102.5 ± 0.6	0.825
GSRS overall score	1.05 ± 0.08	1.02 ± 0.03	1.07 ± 0.09	0.491
GSRS acid reflux score	1.00 ± 0.00	1.00 ± 0.00	1.00 ± 0.00	-
GSRS abdominal pain score	1.00 ± 0.00	1.00 ± 0.00	1.08 ± 0.17	0.234
GSRS indigestion score	1.04 ± 0.10	1.08 ± 0.13	1.00 ± 0.00	0.465
GSRS diarrhea score	1.11 ± 0.27	1.00 ± 0.00	1.08 ± 0.17	0.582
GSRS constipation score	1.11 ± 0.17	1.00 ± 0.00	1.17 ± 0.33	0.394
Values are presented as mean ± standard deviations.
	KD + placebo (N = 6)	KD + KF (N = 6)	Control (N = 4)	Comparison between groups
	n	n	n	p value (Fisher)
Urine protein, - / ± / 1+	4 / 2 / 0	5 / 1 / 0	4 / 0 / 0	0.743
Urine glucose, - / ± / 1+	6 / 0 / 0	6 / 0 / 0	4 / 0 / 0	1
Urine urobilinogen, - / ± / 1+	0 / 6 / 0	0 / 6 / 0	0 / 4 / 0	1
