# Supplementary material for: Ketogenic Effects of Multiple Doses of a Medium Chain Triglycerides Enriched Ketogenic Formula in Healthy Men under the Ketogenic Diet: A Randomized, Double-Blinded, Placebo-Controlled Study
Source: Nutrients. 2022 Mar 12;14(6):1199. doi: 10.3390/nu14061199 (PMC8955388; doi:10.3390/nu14061199)
Supplement: Supplementary file 1 [file nutrients-14-01199-s001.zip › Supplemental_Table_3.xlsx]

## Sheet: Sheet1
Supplemental Table 3. Analysis of activity measurement.
Average METs	KD + placebo (N = 6)	KD + KF (N = 6)	control (N = 4)	Comparison between groups (p value)
Day 1	1.4717 ± 0.0696	1.5205 ± 0.1033	1.5168 ± 0.0544	0.546
Day 2	1.4900 ± 0.1040	1.5187 ± 0.1367	1.7068 ± 0.1308	0.042
Day 3	1.5550 ± 0.1518	1.6677 ± 0.2453	1.7868 ± 0.1219	0.198
Day 4	1.3177 ± 0.1117	1.3982 ± 0.1880	1.3315 ± 0.0329	0.575
Day 5	1.3838 ± 0.1105	1.4683 ± 0.1787	1.4585 ± 0.1706	0.607
Values are presented as mean ± standard deviations.
