# Supplementary material for: Ketogenic Effects of Multiple Doses of a Medium Chain Triglycerides Enriched Ketogenic Formula in Healthy Men under the Ketogenic Diet: A Randomized, Double-Blinded, Placebo-Controlled Study
Source: Nutrients. 2022 Mar 12;14(6):1199. doi: 10.3390/nu14061199 (PMC8955388; doi:10.3390/nu14061199)
Supplement: Supplementary file 1 [file nutrients-14-01199-s001.zip › Supplemental_Table_4.xlsx]

## Sheet: Sheet1
Supplemental Table 4. Analysis of body measurement.
	KD + placebo (N = 6)	KD + KF (N = 6)	control (N = 4)	Comparison between groups (p value)
Body weight, kg
Day 1	61.93 ± 6.58	62.22 ± 6.19	59.90 ± 6.02	0.836
Day 5	59.97 ± 6.61 **	60.38 ± 5.82 **	59.08 ± 5.65 *	0.946
BMI, kg / m 2
Day 1	21.08 ± 1.57	21.33 ± 1.81	20.77 ± 1.49	0.873
Day 5	20.42 ± 1.63 **	20.72 ± 1.70 **	20.50 ± 1.36 *	0.946
Body fat mass, kg
Day 1	10.72 ± 3.00	10.15 ± 2.60	10.05 ± 3.82	0.929
Day 5	9.78 ± 2.96 *	9.48 ± 2.32 *	9.45 ± 3.88	0.979
Muscle mass, kg
Day 1	48.40 ± 4.68	49.13 ± 4.13	47.10 ± 2.26	0.74
Day 5	47.48 ± 4.23	48.08 ± 3.84 *	46.92 ± 2.21	0.888
Skeletal muscle mass, kg
Day 1	28.62 ± 2.90	29.17 ± 2.77	27.92 ± 1.35	0.759
Day 5	28.27 ± 2.67	28.67 ± 2.55	27.95 ± 1.45	0.895
Right arm muscle mass, kg
Day 1	2.667 ± 0.343	2.703 ± 0.313	2.630 ± 0.192	0.931
Day 5	2.655 ± 0.303	2.650 ± 0.297	2.628 ± 0.165	0.987
Left arm muscle mass, kg
Day 1	2.618 ± 0.387	2.722 ± 0.340	2.578 ± 0.143	0.768
Day 5	2.600 ± 0.343	2.613 ± 0.303 *	2.607 ± 0.124	0.997
Trunk muscle mass, kg
Day 1	22.37 ± 2.08	22.72 ± 1.88	22.10 ± 1.02	0.866
Day 5	22.38 ± 1.88	22.33 ± 1.72 *	22.20 ± 0.90	0.985
Right leg muscle mass, kg
Day 1	8.362 ± 0.959	8.193 ± 0.608	7.973 ± 0.464	0.722
Day 5	8.100 ± 0.785 *	8.057 ± 0.549 *	7.898 ± 0.510	0.883
Left leg muscle mass, kg
Day 1	8.418 ± 1.014	8.165 ± 0.587	7.968 ± 0.495	0.657
Day 5	8.158 ± 0.831 *	8.078 ± 0.566	7.890 ± 0.491	0.823
Values are presented as mean ± standard deviations. *: p < 0.05, **: p < 0.01, vs. Day 1, paired t-test
