# Supplementary material for: Ketogenic Effects of Multiple Doses of a Medium Chain Triglycerides Enriched Ketogenic Formula in Healthy Men under the Ketogenic Diet: A Randomized, Double-Blinded, Placebo-Controlled Study
Source: Nutrients. 2022 Mar 12;14(6):1199. doi: 10.3390/nu14061199 (PMC8955388; doi:10.3390/nu14061199)
Supplement: Supplementary file 1 [file nutrients-14-01199-s001.zip › Supplemental_Table_5.xlsx]

## Sheet: Sheet1
Supplemental Table 5. Analysis of vital signs.
	KD + placebo (N = 6)		KD + KF (N = 6)		Control (N = 4)		Comparison between groups (p value)
	mean ± standard deviations	Comparison with Day 1_before breakfast (p value)	mean ± standard deviations	Comparison with Day 1_before breakfast (p value)	mean ± standard deviations	Comparison with Day 1_before breakfast (p value)
Body temperature, °C
Day1_before breakfast	36.55 ± 0.34	-	36.37 ± 0.39	-	36.35 ± 0.24	-	0.572
Day1_before sleep	36.85 ± 0.34	0.072	36.70 ± 0.24	0.017	36.77 ± 0.22	0.048	0.66
Day2_before breakfast	36.45 ± 0.29	0.296	36.43 ± 0.23	0.638	36.25 ± 0.35	0.546	0.523
Day2_before sleep	36.85 ± 0.32	0.041	36.63 ± 0.27	0.102	36.67 ± 0.51	0.232	0.564
Day3_before breakfast	36.52 ± 0.26	0.846	36.37 ± 0.12	1	36.50 ± 0.36	0.406	0.54
Day3_before sleep	36.97 ± 0.29	0.012	36.48 ± 0.41	0.457	36.75 ± 0.26	0.034	0.079
Day4_before breakfast	36.50 ± 0.17	0.762	36.23 ± 0.24	0.444	36.33 ± 0.31	0.867	0.179
Day4_before sleep	36.77 ± 0.34	0.093	36.65 ± 0.29	0.288	36.70 ± 0.39	0.069	0.836
Day5_before breakfast	36.60 ± 0.27	0.624	36.50 ± 0.17	0.47	36.45 ± 0.31	0.308	0.621
Maximum blood pressure, mmHg
Day1_before breakfast	122.8 ± 8.5	-	122.5 ± 5.4	-	118.0 ± 8.4	-	0.565
Day1_before sleep	117.2 ± 11.3	0.136	118.5 ± 10.9	0.479	117.0 ± 7.7	0.863	0.967
Day2_before breakfast	120.2 ± 12.9	0.49	120.7 ± 8.9	0.626	117.2 ± 8.9	0.898	0.873
Day2_before sleep	122.8 ± 14.4	1	127.8 ± 11.1	0.223	117.0 ± 2.2	0.823	0.359
Day3_before breakfast	121.7 ± 11.3	0.504	119.2 ± 5.5	0.129	116.2 ± 6.0	0.534	0.611
Day3_before sleep	125.7 ± 5.4	0.35	123.8 ± 11.1	0.791	115.0 ± 7.5	0.569	0.167
Day4_before breakfast	116.5 ± 7.9	0.028	116.8 ± 12.0	0.19	113.8 ± 8.7	0.379	0.877
Day4_before sleep	120.7 ± 4.7	0.665	123.0 ± 9.7	0.908	121.0 ± 9.1	0.695	0.866
Day5_before breakfast	120.2 ± 9.3	0.509	125.5 ± 11.8	0.491	119.8 ± 6.1	0.667	0.565
Minimum blood pressure, mmHg
Day1_before breakfast	75.8 ± 6.8	-	71.2 ± 9.3	-	71.2 ± 6.4	-	0.533
Day1_before sleep	68.7 ± 6.1	0.004	65.8 ± 5.3	0.267	65.8 ± 4.9	0.281	0.615
Day2_before breakfast	75.7 ± 6.2	0.897	69.7 ± 8.8	0.486	72.8 ± 6.9	0.432	0.404
Day2_before sleep	67.5 ± 6.2	< 0.001	70.2 ± 11.1	0.826	74.0 ± 3.9	0.408	0.483
Day3_before breakfast	70.8 ± 7.1	0.144	67.8 ± 8.6	0.372	73.2 ± 2.2	0.5	0.496
Day3_before sleep	71.5 ± 8.2	0.182	68.8 ± 8.5	0.574	72.5 ± 5.0	0.803	0.734
Day4_before breakfast	69.3 ± 9.5	0.201	71.2 ± 10.0	1	71.5 ± 5.7	0.964	0.913
Day4_before sleep	69.2 ± 3.3	0.035	67.8 ± 6.7	0.361	68.0 ± 4.8	0.212	0.894
Day5_before breakfast	73.7 ± 6.9	0.494	67.8 ± 6.2	0.233	70.5 ± 6.6	0.624	0.337
Heart rate, times/minute
Day1_before breakfast	64.5 ± 6.4	-	67.2 ± 14.9	-	62.5 ± 5.9	-	0.782
Day1_before sleep	71.0 ± 9.5	0.058	75.3 ± 14.5	0.04	60.8 ± 11.8	0.692	0.21
Day2_before breakfast	66.7 ± 8.0	0.369	71.2 ± 13.5	0.482	64.8 ± 10.0	0.498	0.63
Day2_before sleep	75.2 ± 11.1	0.02	73.2 ± 10.9	0.253	62.8 ± 5.7	0.854	0.174
Day3_before breakfast	69.3 ± 8.2	0.194	67.5 ± 16.2	0.956	63.8 ± 11.7	0.715	0.791
Day3_before sleep	80.3 ± 13.0	0.021	77.7 ± 9.7	0.031	69.2 ± 11.3	0.091	0.34
Day4_before breakfast	73.5 ± 8.1	0.002	71.2 ± 15.9	0.379	72.2 ± 14.9	0.133	0.954
Day4_before sleep	85.8 ± 18.2	0.021	76.3 ± 8.8	0.092	68.8 ± 13.6	0.213	0.202
Day5_before breakfast	75.0 ± 12.9	0.074	74.7 ± 13.9	0.301	66.8 ± 8.4	0.054	0.545
