# Supplementary material for: Ketogenic Effects of Multiple Doses of a Medium Chain Triglycerides Enriched Ketogenic Formula in Healthy Men under the Ketogenic Diet: A Randomized, Double-Blinded, Placebo-Controlled Study
Source: Nutrients. 2022 Mar 12;14(6):1199. doi: 10.3390/nu14061199 (PMC8955388; doi:10.3390/nu14061199)
Supplement: Supplementary file 1 [file nutrients-14-01199-s001.zip › Supplemental_Table_6.xlsx]

## Sheet: Sheet1
Supplemental Table 6. Analysis of muscle strength
	KD + placebo (N = 6)	KD + KF (N = 6)	Control (N = 4)	Comparison between groups (p value)
Right grip strength, kgf
baseline	44.52 ± 3.07	39.68 ± 5.37	41.05 ± 5.84	0.235
Day 5	44.22 ± 3.64	41.38 ± 6.29	39.65 ± 5.68	0.405
Left grip strength, kgf
baseline	42.95 ± 6.92	41.27 ± 4.76	40.38 ± 5.07	0.772
Day 5	42.12 ± 6.79	40.75 ± 4.66	39.23 ± 6.91	0.766
Right toe strength, kgf
baseline	4.72 ± 1.85	4.55 ± 1.21	5.67 ± 1.21	0.491
Day 5	5.67 ± 1.49	5.32 ± 0.96 *	6.07 ± 0.71	0.603
Left toe strength, kgf
baseline	4.98 ± 1.91	4.13 ± 1.33	4.95 ± 1.38	0.606
Day 5	6.27 ± 1.30	4.48 ± 1.08	4.75 ± 1.22	0.053
Medial knee strength, kgf
baseline	26.50 ± 6.65	25.88 ± 4.70	29.27 ± 3.80	0.609
Day 5	34.32 ± 8.88 *	31.58 ± 5.68	33.48 ± 5.87	0.798
Lateral knee strength, kgf
baseline	17.98 ± 6.69	20.40 ± 6.76	21.07 ± 8.09	0.759
Day 5	21.53 ± 5.06	23.18 ± 3.79	23.23 ± 8.14	0.846
Values are presented as mean ± standard deviations. *: p < 0.05, **: p < 0.01, vs. Day 1, paired t-test
